# Supplementary material
Source: Springer Nature journal article supplement (https://www.springermedizin.de/resource/supplementary/12889_2006_500_MOESM2_ESM.pdf/9501012)

# INTRAGENERATIONAL SOCIAL MOBILITY

Socioeconomic position groups  
 High = Non-manual occupation  
 Low = Manual occupation

## Cardiovascular mortality

## All-cause mortality

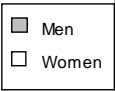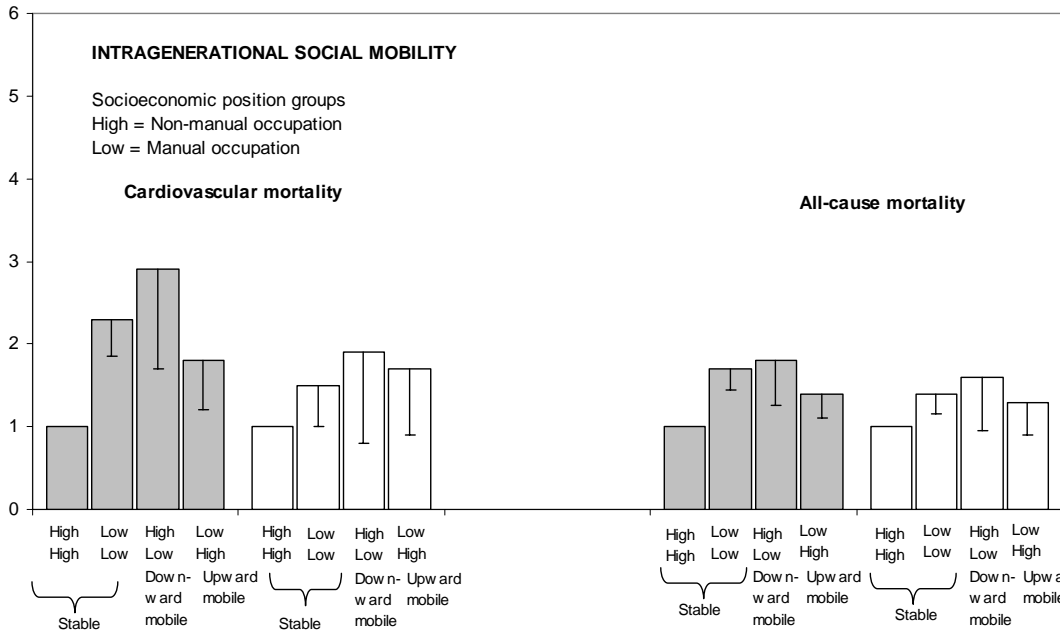

Supplement: MOESM2 [file 9501012]
